# Supplementary material for: Tuning the gate opening pressure of a flexible doubly interpenetrated metal–organic framework through ligand functionalization
Source: Royal Society of Chemistry journal article supplement (doi:10.1039/c8dt02544d), 2018-01-01
Supplement: c8dt02544d1.pdf [file c8dt02544d1.pdf]

## Electronic Supplementary Information

# Tuning the Gate Opening Pressure of a Flexible Doubly Interpenetrated Metal-Organic Framework through Ligand Functionalization

Xiaodong Sun,<sup>a</sup> Yali Ma,<sup>a</sup> Jun Zhao,<sup>b</sup> Dongsheng Li,<sup>b</sup> Guanghua Li,<sup>a</sup> Lirong Zhang<sup>\*a</sup> and Yunling Liu<sup>\*a</sup>

<sup>a</sup> State Key Laboratory of Inorganic Synthesis and Preparative Chemistry, College of Chemistry, Jilin University, Changchun 130012, P. R. China.

E-mail: yunling@jlu.edu.cn; zlr@jlu.edu.cn

<sup>b</sup> College of Materials and Chemical Engineering, Key Laboratory of Inorganic Nonmetallic Crystalline and Energy Conversion Material, China Three Gorges University, Yichang 443002, China

### S1. Calculation procedures of selectivity from IAST

The measured experimental data is excess loadings ( $q^{ex}$ ) of the pure components C<sub>2</sub>H<sub>2</sub>, CO<sub>2</sub>, CH<sub>4</sub>, C<sub>2</sub>H<sub>6</sub> and C<sub>3</sub>H<sub>8</sub> for **JLU-Liu33F**, which should be converted to absolute loadings ( $q$ ) firstly.

$$q = q^{ex} + \frac{pV_{pore}}{ZRT}$$

Here  $Z$  is the compressibility factor. The Peng-Robinson equation was used to estimate the value of compressibility factor to obtain the absolute loading, while the measure pore volume 0.36 cm<sup>3</sup> g<sup>-1</sup> is also necessary.

The dual-site Langmuir-Freundlich equation is used for fitting the isotherm data at 298 K.

$$q = q_{m1} \times \frac{b_1 \times p^{1/n_1}}{1 + b_1 \times p^{1/n_1}} + q_{m2} \times \frac{b_2 \times p^{1/n_2}}{1 + b_2 \times p^{1/n_2}}$$

Here  $p$  is the pressure of the bulk gas at equilibrium with the adsorbed phase (kPa),  $q$  is the adsorbed amount per mass of adsorbent (mol kg<sup>-1</sup>),  $q_{m1}$  and  $q_{m2}$  are the saturation capacities of sites 1 and 2 (mol kg<sup>-1</sup>),  $b_1$  and  $b_2$  are the affinity coefficients of sites 1 and 2 (1/kPa),  $n_1$  and  $n_2$  are the deviations from an ideal homogeneous surface.

The selectivity of preferential adsorption of component 1 over component 2 in a mixture containing 1 and 2, perhaps in the presence of other components too, can be formally defined as

$$S = \frac{q_1/q_2}{p_1/p_2}$$

$q_1$  and  $q_2$  are the absolute component loadings of the adsorbed phase in the mixture. These component loadings are also termed the uptake capacities. We calculate the values of  $q_1$  and  $q_2$  using the Ideal

## S2. Supporting Figures

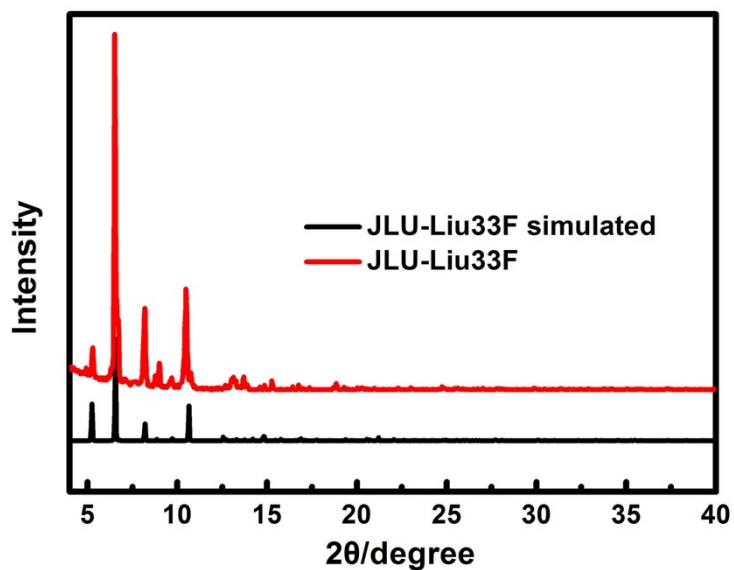

Fig. S1 PXRD patterns of simulated, as-synthesized sample for JLU-Liu33F

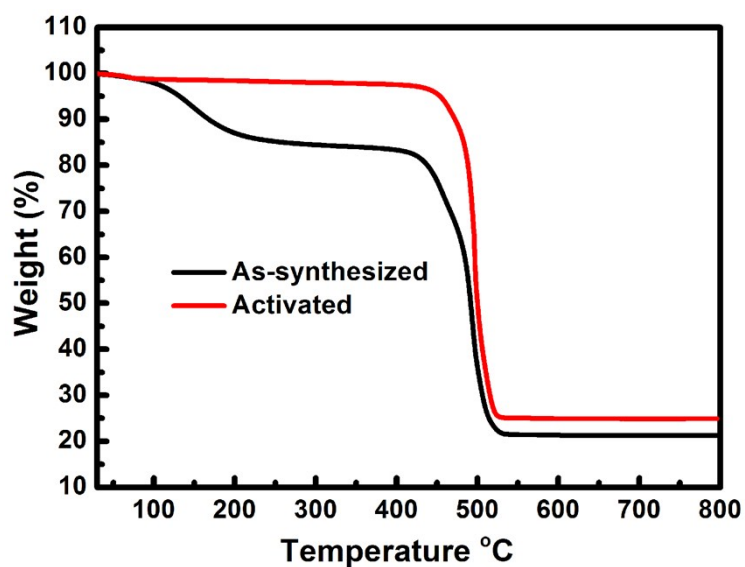

Fig. S2 TGA curves of JLU-Liu33F for the as-synthesized and activated samples.

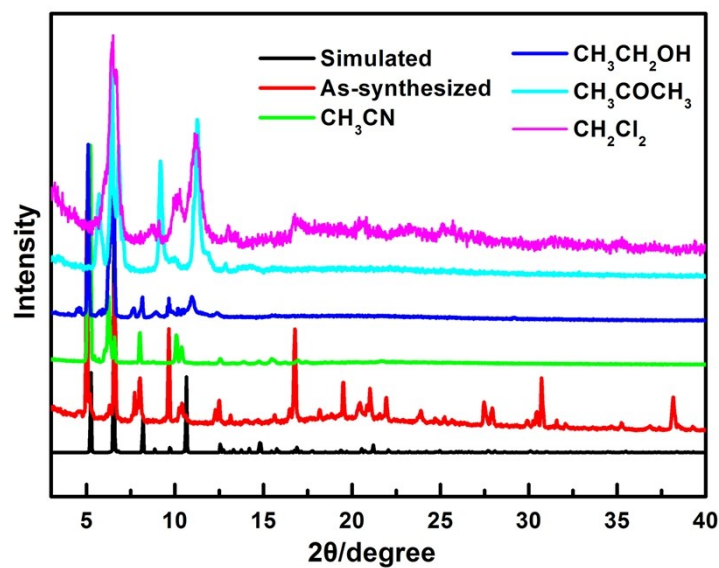

**Fig. S3** PXRD patterns of **JLU-Liu33F** for simulated, as-synthesized and solvent-exchanged samples. **JLU-Liu33F** was stable in ethanol and acetonitrile and was relatively unstable in acetone and dichloromethane.

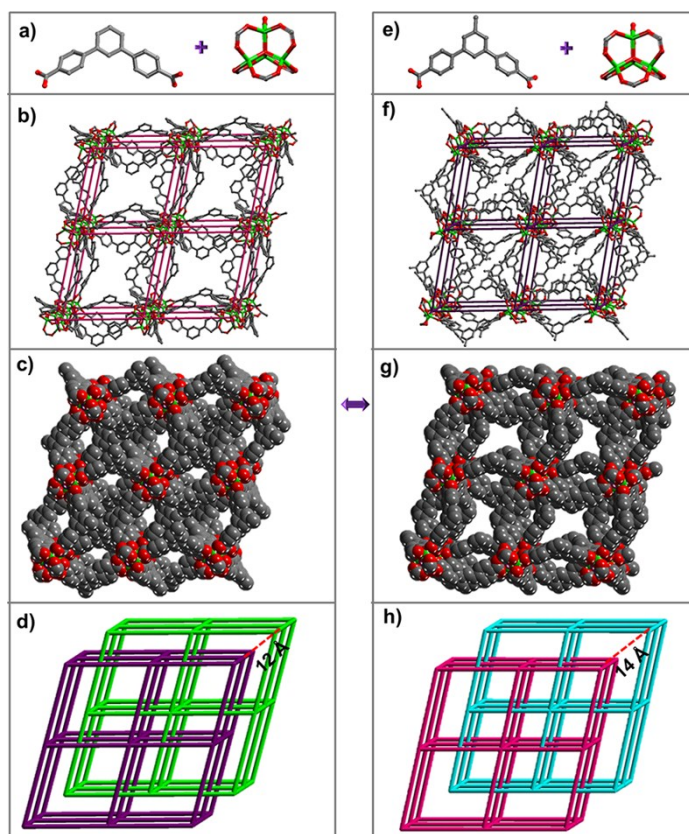

**Fig. S4** Structure comparison of the two materials **JLU-Liu33** (left) and **JLU-Liu33F** (right): a) and e) The V-shaped ligands and  $Zn_4O$  clusters; b) and f) Single net of the framework; c) and g) Space-filling model of the channel for the single net along the [100] direction; d) and h) The difference of interpenetration degree.

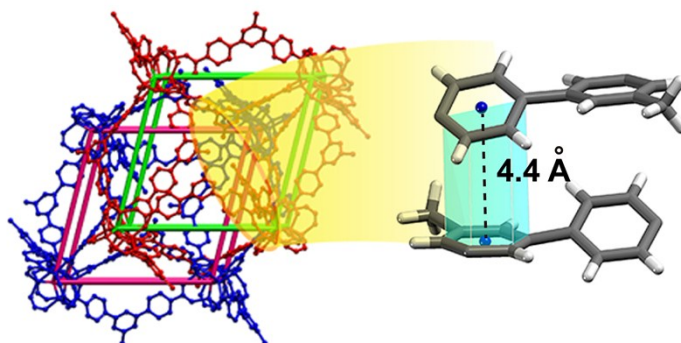

**Fig. S5.** The weak  $\pi \dots \pi$  interactions between the phenyl rings of  $H_2MDCPB$  ligands, which belong to two interpenetrated nets of **JLU-Liu33F**.

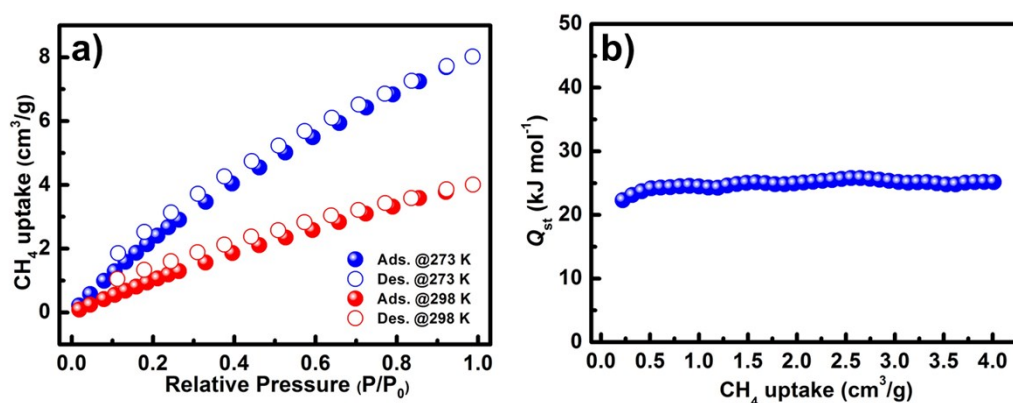

**Fig. S6** (a)  $CH_4$  adsorption isotherms for **JLU-Liu33F** at 273 and 298 K under 1 bar and (b)  $Q_{st}$  of  $CH_4$  for **JLU-Liu33F**.

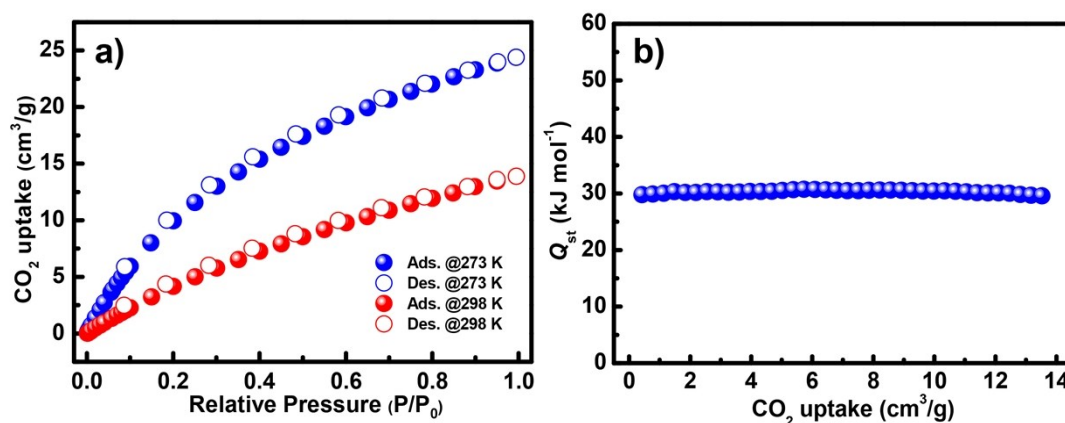

**Fig. S7** (a)  $CO_2$  adsorption isotherms for **JLU-Liu33F** at 273 and 298 K under 1 bar and (b)  $Q_{st}$  of  $CO_2$  for **JLU-Liu33F**.

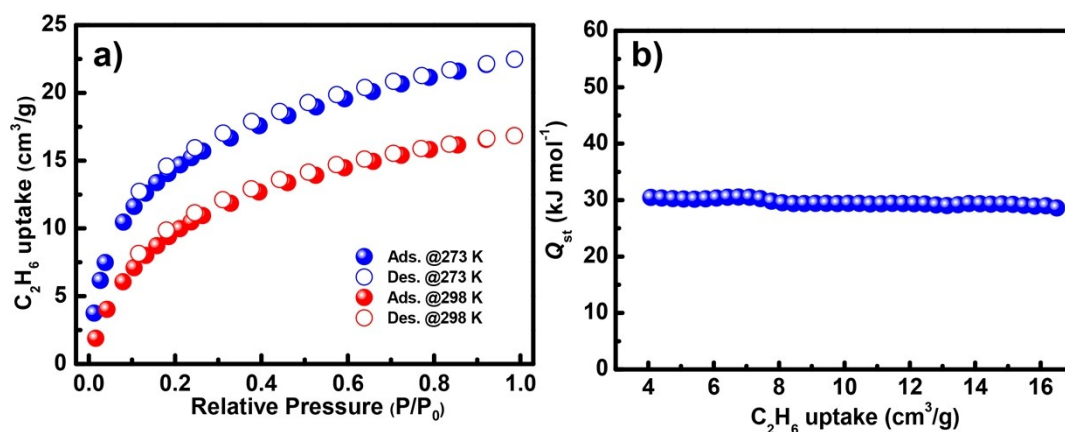

Fig. S8 (a)  $C_2H_6$  adsorption isotherms for JLU-Liu33F at 273 and 298 K under 1 bar and (b)  $Q_{st}$  of  $C_2H_6$  for JLU-Liu33F.

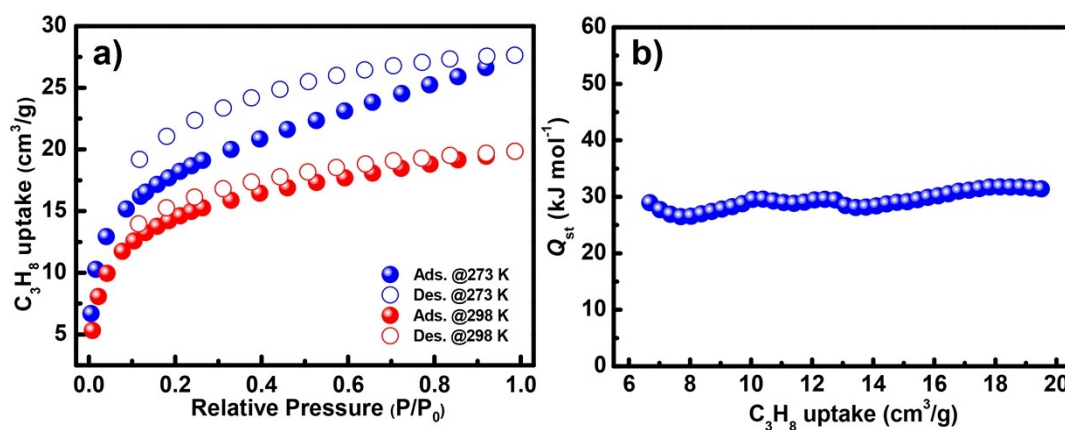

Fig. S9 (a)  $C_3H_8$  adsorption isotherms for JLU-Liu33F at 273 and 298 K under 1 bar and (b)  $Q_{st}$  of  $C_3H_8$  for JLU-Liu33F.

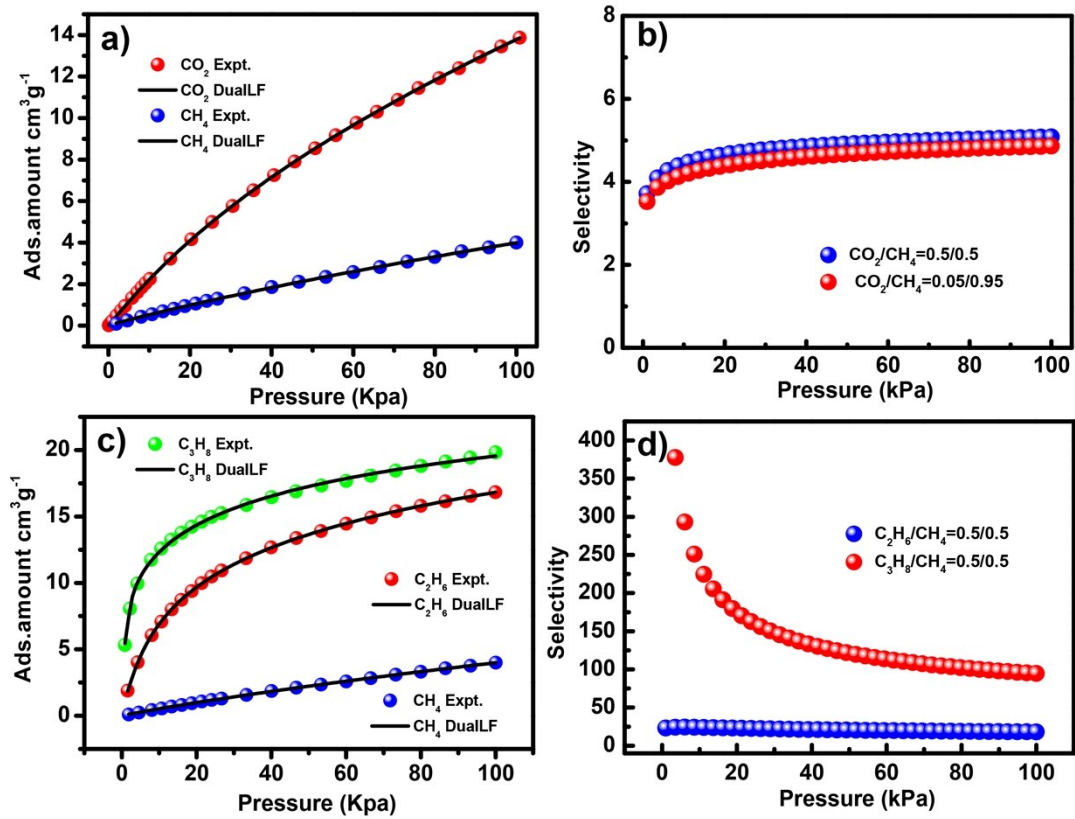

**Fig. S10**  $\text{CO}_2$ ,  $\text{CH}_4$ ,  $\text{C}_2\text{H}_6$  and  $\text{C}_3\text{H}_8$  adsorption isotherms at 298 K along with the dual-site Langmuir Freundlich (DSLFF) fits (a and c); gas mixture adsorption selectivity are predicted by IAST at 298 K and 100 kPa for **JLU-Liu33F** (b and d).

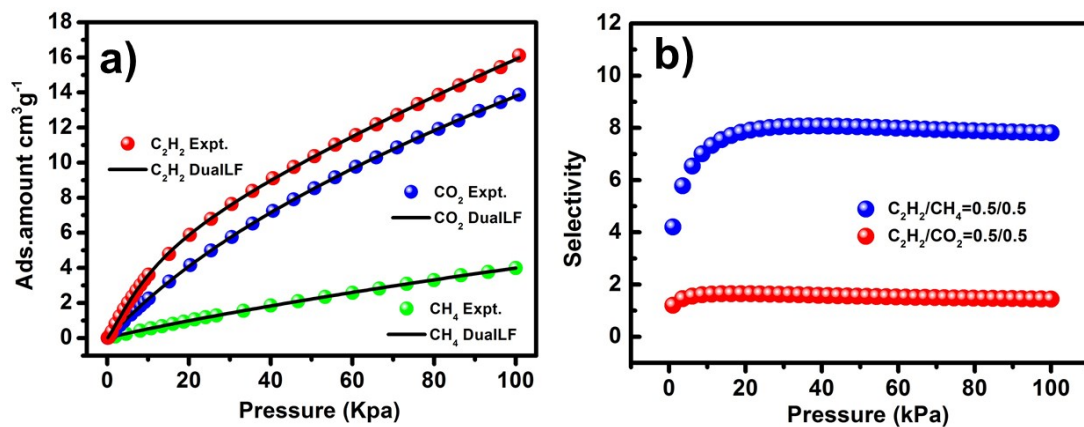

**Fig. S11** (a)  $\text{C}_2\text{H}_2$ ,  $\text{CO}_2$  and  $\text{CH}_4$  adsorption isotherms at 298 K along with the dual-site Langmuir-Freundlich (DSLFF) fits; (b)  $\text{C}_2\text{H}_2/\text{CH}_4$  and  $\text{C}_2\text{H}_2/\text{CO}_2$  adsorption selectivity are calculated by IAST at 298 K and 1 bar for **JLU-Liu33F**.

### S3. Supporting Tables

**Table S1.** Crystal data and structure refinement for **JLU-Liu33F**.

|                                                                          |                                                                                  |
|--------------------------------------------------------------------------|----------------------------------------------------------------------------------|
| formula                                                                  | C <sub>138</sub> H <sub>118</sub> N <sub>4</sub> O <sub>33</sub> Zn <sub>8</sub> |
| formula weight                                                           | 2883.32                                                                          |
| temp (K)                                                                 | 293(2) K                                                                         |
| wavelength (Å)                                                           | 0.71073 Å                                                                        |
| crystal system, space group                                              | Trigonal, <i>R3c</i>                                                             |
| <i>a</i> (Å)                                                             | 21.613(3)                                                                        |
| <i>b</i> (Å)                                                             | 21.613(3)                                                                        |
| <i>c</i> (Å)                                                             | 78.182(16)                                                                       |
| <i>V</i> (Å <sup>3</sup> )                                               | 31627(9)                                                                         |
| <i>Z</i> , <i>D<sub>c</sub></i> (Mg/m <sup>3</sup> )                     | 6, 0.908                                                                         |
| <i>F</i> (000)                                                           | 8868                                                                             |
| θ range (deg)                                                            | 1.21 to 25.05°                                                                   |
| reflins collected/unique                                                 | 65434/12454                                                                      |
| <i>R<sub>int</sub></i>                                                   | 0.0580                                                                           |
| data/restraints/params                                                   | 12454/151/418                                                                    |
| GOF on <i>F</i> <sup>2</sup>                                             | 1.020                                                                            |
| <i>R<sub>1</sub></i> , <i>wR<sub>2</sub></i> ( <i>I</i> >2σ( <i>I</i> )) | <i>R</i> <sub>1</sub> = 0.0632, <i>wR</i> <sub>2</sub> = 0.1807                  |
| <i>R<sub>1</sub></i> , <i>wR<sub>2</sub></i> (all data)                  | <i>R</i> <sub>1</sub> = 0.0994, <i>wR</i> <sub>2</sub> = 0.1997                  |

After refining the crystal with the modern version refinement engine, the main CheckCIF A alerts have been solved. However, there still exists B alerts in the report. The B-level errors in the crystal data according to their checkCIF/PLATON report has been explained in the ESI: The bond length unrealistic is ascribed to weak CH···π interactions between the phenyl rings of H<sub>2</sub>MDCPB ligands which belongs to two interpenetrated nets. The CH···π interactions lead to the deformation of the phenyl rings, so the C31-C34 bond length is longer. There also exists “Low bond precision on C-C Bonds” problems in the check report, but it will not influence the accuracy of the JLU-Liu33F structure.

**Table S2.** Selected bond lengths [Å] and angles [°] for **JLU-Liu33F**.

|               |           |                     |           |
|---------------|-----------|---------------------|-----------|
| Zn(1)-O(1)    | 1.956(5)  | O(6)-C(34)          | 1.242(16) |
| Zn(1)-O(5)    | 1.957(4)  | O(7)-C(34)          | 1.283(15) |
| Zn(2)-O(5)    | 1.954(11) | O(8)-C(41)          | 1.128(11) |
| Zn(2)-O(11)   | 2.190(11) | O(9)-C(41)          | 1.562(10) |
| Zn(3)-O(10)   | 1.902(3)  | C(1)-C(2)           | 1.3900    |
| Zn(3)-O(6)    | 1.923(8)  | C(1)-C(6)           | 1.3900    |
| Zn(4)-O(10)   | 2.047(10) | C(1)-C(7)           | 1.518(6)  |
| Zn(1)-O(3)#1  | 1.918(8)  | C(2)-C(3)           | 1.3900    |
| Zn(1)-O(2)#2  | 1.968(8)  | C(7)-C(8)           | 1.3900    |
| Zn(2)-O(11)#2 | 2.190(11) | C(7)-C(12)          | 1.3900    |
| Zn(2)-O(11)#3 | 2.190(11) | C(8)-C(9)           | 1.3900    |
| Zn(2)-O(4)#4  | 2.200(10) | C(10)-C(13)         | 1.452(10) |
| Zn(3)-O(7)#6  | 1.947(6)  | O(1)-Zn(1)-O(5)     | 111.9(2)  |
| Zn(4)-O(9)#10 | 1.887(5)  | O(11)#2-Zn(2)-O(11) | 36.5(4)   |
| Zn(4)-O(9)#7  | 1.887(5)  | O(5)-Zn(2)-O(4)#5   | 88.2(3)   |

|            |           |                 |          |
|------------|-----------|-----------------|----------|
| O(1)-C(13) | 1.273(9)  | C(3)-C(4)-C(5)  | 120.0    |
| O(2)-C(13) | 1.273(10) | C(4)-C(5)-C(21) | 119.0(6) |
| O(3)-C(20) | 1.506(13) | C(8)-C(7)-C(12) | 120.0    |
| O(4)-C(20) | 1.250(12) | C(8)-C(9)-C(10) | 120.0    |

Symmetry transformations used to generate equivalent atoms:

#1  $x-1/3, x-y+4/3, z-1/6$  #2  $-y+1, x-y+1, z$  #3  $-x+y, -x+1, z$  #4  $-y+5/3, -x+4/3, z-1/6$  #5  $-x+y-1/3, y-2/3, z-1/6$  #6  $-y+2, x-y+1, z$  #7  $x+1/3, x-y+2/3, z+1/6$  #8  $-x+y+1, -x+2, z$  #9  $-y+4/3, -x+5/3, z+1/6$  #10  $-x+y+4/3, y+2/3, z+1/6$  #11  $x+1/3, x-y+5/3, z+1/6$  #12  $x-1/3, x-y+1/3, z-1/6$

**Table S3.** Gas adsorption data for **JLU-Liu33F**.

| Gas         | $C_2H_2$ ( $cm^3g^{-1}$ ) |       | $CO_2$ ( $cm^3g^{-1}$ ) |       | $CH_4$ ( $cm^3g^{-1}$ ) |       |
|-------------|---------------------------|-------|-------------------------|-------|-------------------------|-------|
|             | 273 K                     | 298 K | 273 K                   | 298 K | 273 K                   | 298 K |
| Temperature |                           |       |                         |       |                         |       |
| Ads. amount | 48                        | 16    | 24                      | 14    | 8                       | 4     |

  

| Gas         | $C_2H_6$ ( $cm^3g^{-1}$ ) |       | $C_3H_8$ ( $cm^3g^{-1}$ ) |       | $N_2$ ( $cm^3g^{-1}$ ) |
|-------------|---------------------------|-------|---------------------------|-------|------------------------|
|             | 273 K                     | 298 K | 273 K                     | 298 K | 77 K                   |
| Temperature |                           |       |                           |       |                        |
| Ads. amount | 22                        | 15    | 27                        | 17    | 225                    |

**Table S4.** Comparison of several MOFs for their  $C_2H_2$  uptake (273 K and 1 bar) and  $Q_{st}$  values.

| Compound                   | $C_2H_2$ uptake (273 K, $cm^3 g^{-1}$ ) | $Q_{st}$ ( $kJ mol^{-1}$ ) | Ref.      |
|----------------------------|-----------------------------------------|----------------------------|-----------|
| SNNU-23                    | 93                                      | 63                         | 1         |
| USTA-34b                   | N.A.                                    | 50                         | 1         |
| JLU-Liu33F                 | 48                                      | 49                         | This work |
| SNNU-23                    | 41                                      | 39                         | 1         |
| ZJNU-73                    | N.A.                                    | 33                         | 2         |
| ZJNU-74                    | N.A.                                    | 31                         | 2         |
| FJI-H8                     | 277                                     | 32                         | 3         |
| NJU-Bai17                  | 252                                     | 38                         | 4         |
| MFM-188                    | 297                                     | 33                         | 5         |
| ZJU-12                     | 241                                     | 29                         | 6         |
| MFM-300(V <sup>III</sup> ) | 182                                     | 29                         | 7         |

N.A.; Not available



**Table S5.** A comparison with other MOFs which exhibits high selectivity for C<sub>2</sub>H<sub>2</sub> over CH<sub>4</sub> under 1 bar.

| Compound                     | Selectivity | Temperature (K) | Reference |
|------------------------------|-------------|-----------------|-----------|
| Compound-1                   | 229         | 273             | 8         |
| ZJNU-81                      | 48          | 278             | 9         |
| ZJNU-82                      | 39          | 278             | 9         |
| ZJNU-83                      | 34          | 278             | 9         |
| ZJNU-58                      | 47          | 278             | 10        |
| ZJNU-59                      | 28          | 278             | 10        |
| JLU-Liu33F                   | 57          | 273             | This work |
| SNNU-22                      | 36          | 273             | 1         |
| SNNU-23                      | 31          | 273             | 1         |
| Zn-NH <sub>2</sub> BTB-1-PIM | <31         | 273             | 1         |
| CoTZB(INT)                   | <31         | 273             | 1         |
| [InAg(na) <sub>4</sub> ]     | 17          | 273             | 11        |

## REFERENCES

1. J. W. Zhang, M. C. Hu, S. N. Li, Y. C. Jiang and Q. G. Zhai, *Dalton Trans.*, 2017, **46**, 836-844.
2. F. Chen, D. Bai, D. Jiang, Y. Wang and Y. He, *Dalton Trans.*, 2017, **46**, 11469-11478.
3. J. Pang, F. Jiang, M. Wu, C. Liu, K. Su, W. Lu, D. Yuan and M. Hong, *Nat. Commun.*, 2015, **6**, 7575.
4. M. Zhang, B. Li, Y. Li, Q. Wang, W. Zhang, B. Chen, S. Li, Y. Pan, X. You and J. Bai, *Chem. Commun.*, 2016, **52**, 7241–7244.
5. F. Moreau, I. d. Silva, N. H. A. Smail, T. L. Easun, M. Savage, H. G. W. Godfrey, S. F. Parker, P. Manuel, S. Yang and M. Schröder, *Nat. Commun.*, 2016, **8**, 14085.
6. X. Duan, Y. Cui, Y. Yang and G. Qian, *CrystEngComm*, 2017, **19**, 1464–1469.
7. Z. Lu, H. G. W. Godfrey, I. da Silva, Y. Cheng, M. Savage, P. Manuel, S. Rudic, A. J. Ramirez-Cuesta, S. Yang and M. Schroder, *Chem. Sci.*, 2018, **9**, 3401-3408.
8. H. R. Fu, Y. Zhao, Z. Zhou, X. G. Yang and L. F. Ma, *Dalton Trans.*, 2018, **47**, 3725-3732.
9. M. He, Y. Wang, X. Gao, S. Li and Y. He, *Dalton Trans.*, 2018, **47**, 8983-8991.
10. Y. Wang, M. He, X. Gao, S. Li, S. Xiong, R. Krishna and Y. He, *ACS Appl. Mater. Interfaces*, 2018, **10**, 20559-20568.
11. Y. X. Tan, Y. P. He and J. Zhang, *RSC Adv.*, 2015, **5**, 7794-7797.
